# Supplementary material for: Investigation of high-concentration doping performance based on Er3+-ion-doped Ba6Gd2Ti4O17
Source: Royal Society of Chemistry journal article supplement (doi:10.1039/d1dt00061f), 2021-01-01
Supplement: d1dt00061f1.pdf [file d1dt00061f1.pdf]

## Supporting Information

### **Investigation of high concentration doping performance based on Er<sup>3+</sup> ions doped Ba<sub>6</sub>Gd<sub>2</sub>Ti<sub>4</sub>O<sub>17</sub>**

Yang Xu<sup>1</sup>, Zhiying Wang<sup>1</sup>, Hanyu Xu<sup>1</sup>, Mochen Jia<sup>1</sup>, Rong Wang<sup>1,\*</sup>,  
Tianqi Sheng<sup>2</sup>, Zhen Sun<sup>1</sup>, Xiaoyang Jin<sup>1</sup>, Ziqian Lv<sup>1</sup> and Zuoling Fu<sup>1,\*</sup>

*<sup>1</sup>Coherent Light and Atomic and Molecular Spectroscopy Laboratory,  
Key Laboratory of Physics and Technology for Advanced Batteries,  
College of Physics, Jilin University, Changchun 130012, China, Fax:  
+86-431-85167966; Tel: +86-431-85167966; E-mail: [zlfu@jlu.edu.cn](mailto:zlfu@jlu.edu.cn) (Z.  
L. Fu); [Wangr@jlu.edu.cn](mailto:Wangr@jlu.edu.cn) (R. Wang)*

*<sup>2</sup>Zhong Sheng (Shen Zhen) Medical Equipment Science and Technology  
Co., Ltd., Shenzhen, Guangdong, China*

#### **1. Experimental Section**

##### **1.1 Synthesis of the Y<sub>2</sub>O<sub>3</sub>: 0.1Yb<sup>3+</sup>/0.25Er<sup>3+</sup> phosphor**

Firstly, the stoichiometric amount of rare earth nitrate stock solutions (Y(NO<sub>3</sub>)<sub>3</sub> of 0.5<sub>M</sub>, Yb(NO<sub>3</sub>)<sub>3</sub> of 0.1<sub>M</sub>, Er(NO<sub>3</sub>)<sub>3</sub> of 0.05<sub>M</sub>) was mixed and stirred. Then, citric acid as a chelating agent was add to the mixture at a molar ratio of [citric acid]/[metal]=1:2. After forming a transparent solution, the mixture was dried at 120 °C for 10 h. The obtained gel was

calcined at 500 °C for 2h and then calcined at 1200 °C for 4h.

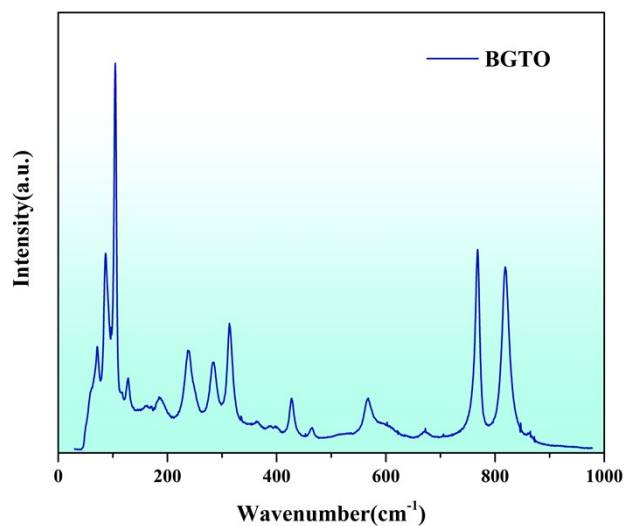

Figure S1. Raman spectrum of BGTO host.

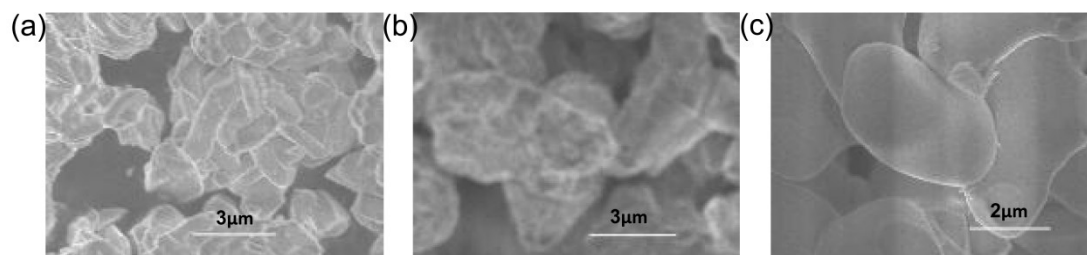

Figure S2. SEM images of the as-synthesized Yb<sup>3+</sup>/Er<sup>3+</sup> co-doped (a) BGTO, (b) BGO and (c) BGZO phosphors.

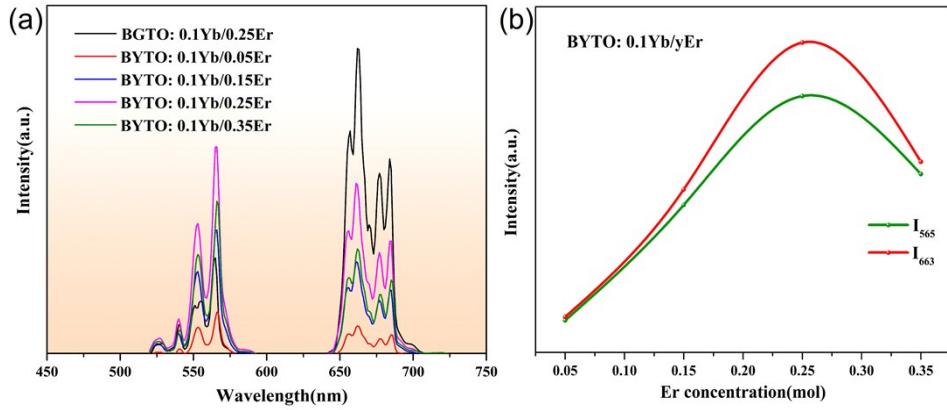

Figure S3. (a) UC emission spectra of BGTO: 0.1Yb<sup>3+</sup>/0.25Er<sup>3+</sup> and BYTO: 0.1Yb<sup>3+</sup>/yEr<sup>3+</sup> (y=0.05, 0.15, 0.25, 0.35) along with (b) the line chart.

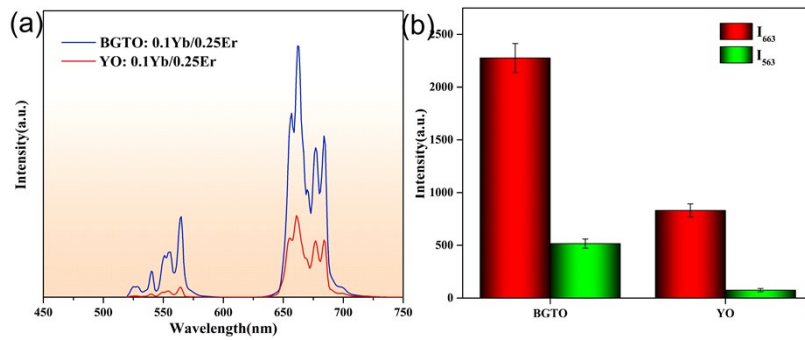

Figure S4. (a) Typical UC luminescence spectra of the BGTO: 0.1Yb<sup>3+</sup>/0.25Er<sup>3+</sup> phosphor and Y<sub>2</sub>O<sub>3</sub>: 0.1Yb<sup>3+</sup>/0.25Er<sup>3+</sup> and (b) the average values of three measurements.

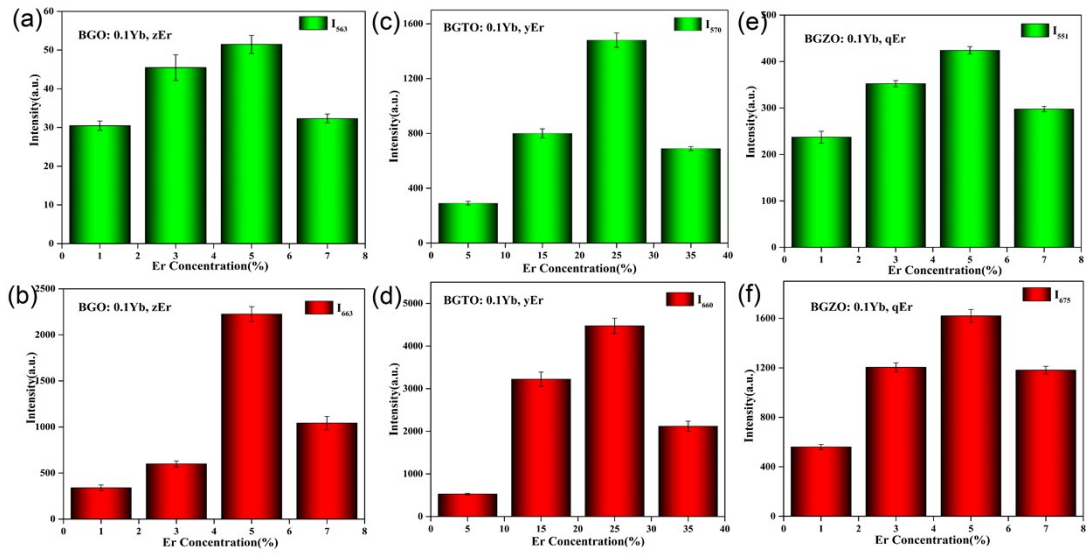

Figure S5. Emission intensities with different Er<sup>3+</sup> concentration of (a)-(b) BGO: 0.1Yb<sup>3+</sup>/zEr<sup>3+</sup> (c)-(d) BGTO: 0.1Yb<sup>3+</sup>/yEr<sup>3+</sup> and (e)-(f) BGZO: 0.1Yb<sup>3+</sup>/qEr<sup>3+</sup> (the average values of three measurements).

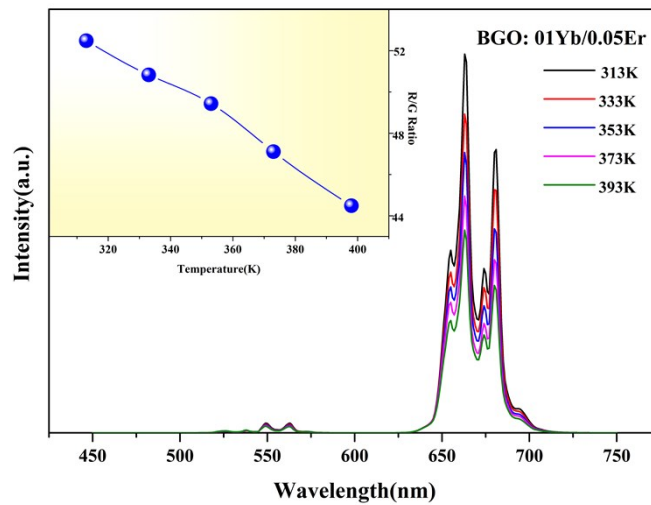

Figure S6. The emission spectra of BGO: 0.1Yb<sup>3+</sup>/0.05Er<sup>3+</sup> and the R/G ratio at different temperatures.

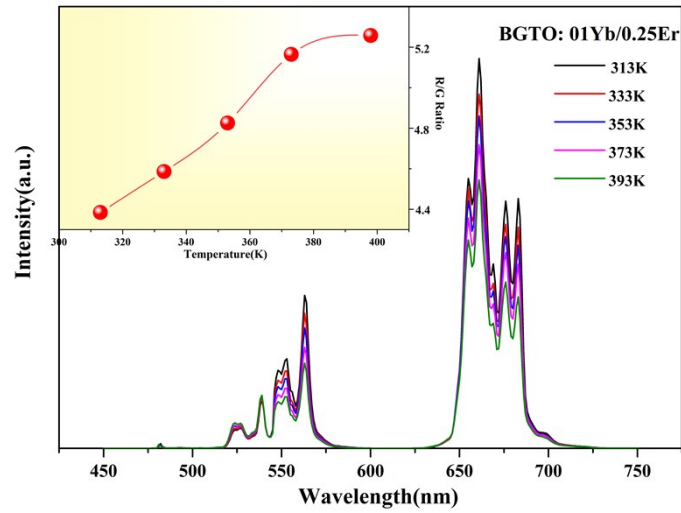

Figure S7. The emission spectra of BGTO: 0.1Yb<sup>3+</sup>/0.25Er<sup>3+</sup> and the red-green ratio at different temperatures.

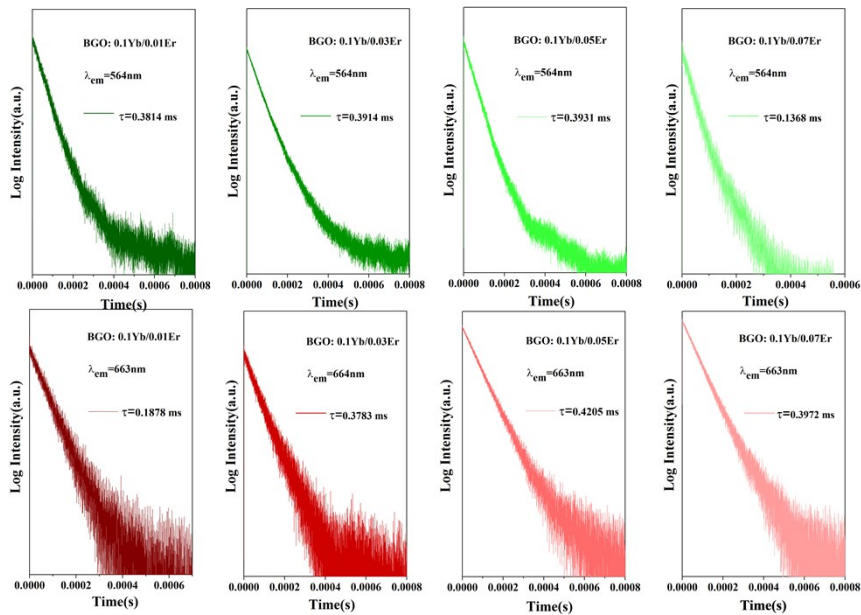

Figure S8. Decay curves of the (a)-(d)  $^4S_{3/2} \rightarrow ^4I_{15/2}$  and (e)-(h)  $^4F_{9/2} \rightarrow ^4I_{15/2}$  transition in BGTO: 0.1Yb<sup>3+</sup>/zEr<sup>3+</sup> (y=0.01-0.07) under 980nm excitation.

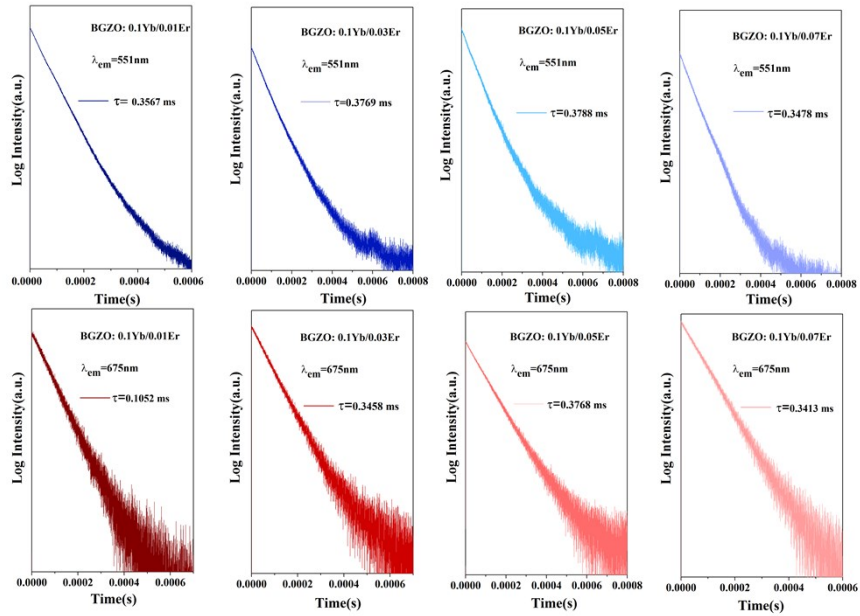

Figure S9. Decay curves of the (a)-(d)  ${}^4S_{3/2} \rightarrow {}^4I_{15/2}$  and (e)-(h)  ${}^4F_{9/2} \rightarrow {}^4I_{15/2}$  transition in BGZO: 0.1Yb $^{3+}$ /qEr $^{3+}$  (y=0.01-0.07) under 980nm excitation.

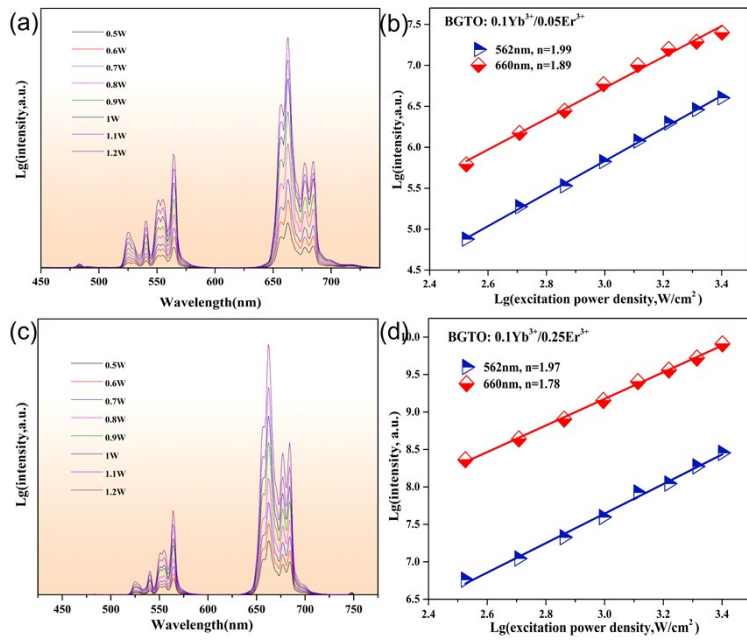

Figure S10. (a), (c) The luminescence spectra at different excitation powers of the BGTO: 0.1Yb $^{3+}$ /0.05Er $^{3+}$  and 0.1Yb $^{3+}$ /0.25Er $^{3+}$  phosphors. (b), (d) The corresponding relationship of red and green UC luminescence intensity versus excitation power density from a 980 nm

laser.

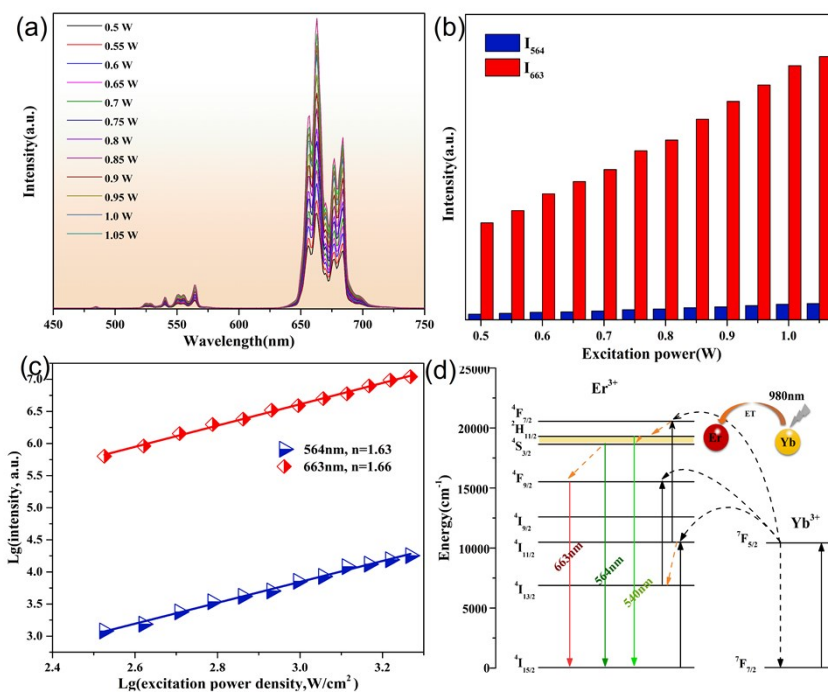

Figure S11. (a)-(b) The emission spectra and histogram at different excitation powers of the BGO: 0.1Yb<sup>3+</sup>/0.05Er<sup>3+</sup> phosphor. (c) The relationship of red and green UC luminescence intensity versus excitation power from a 980 nm laser for the BGO: 0.1Yb<sup>3+</sup>/0.05Er<sup>3+</sup> phosphor. (d) The energy level diagram of Yb<sup>3+</sup>/Er<sup>3+</sup> and the possible energy transfer mechanisms.

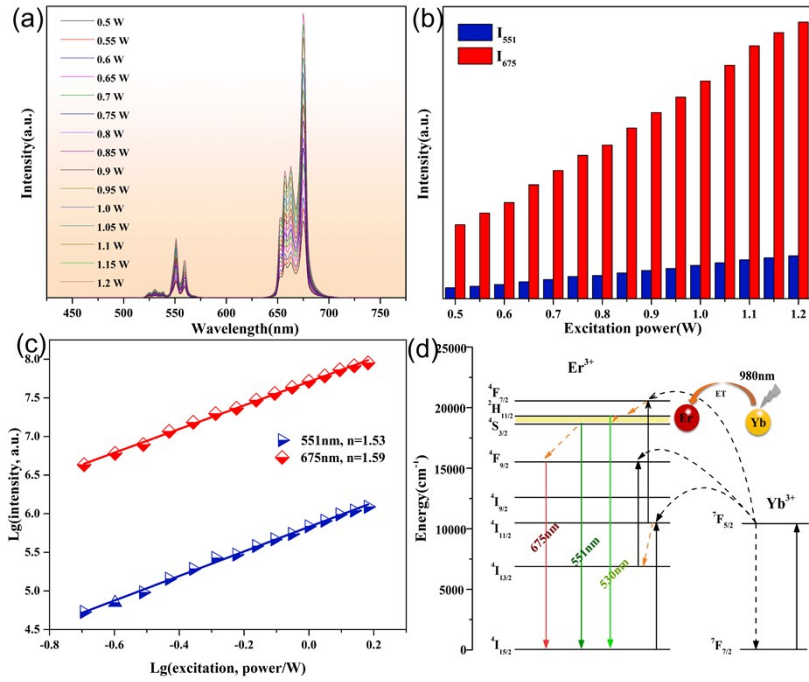

Figure S12. (a)-(b) The emission spectra and histogram at different excitation powers of the BGZO:0.1Yb<sup>3+</sup>/0.05Er<sup>3+</sup> phosphor. (c) The relationship of red and green UC luminescence intensity versus excitation power from a 980 nm laser for the BGZO: 0.1Yb<sup>3+</sup>/0.05Er<sup>3+</sup> phosphor. (d) The energy level diagram of Yb<sup>3+</sup>/Er<sup>3+</sup> and the possible energy transfer mechanisms.
